# Supplementary material for: Evaluation of Methods for the Concentration and Extraction of Viruses from Sewage in the Context of Metagenomic Sequencing
Source: PubMed Central journal article supplement (PMC5242460; doi:10.1371/journal.pone.0170199), 2017-01-18
Supplement: pone.0170199.s001.pdf [file pone.0170199.s001.pdf]

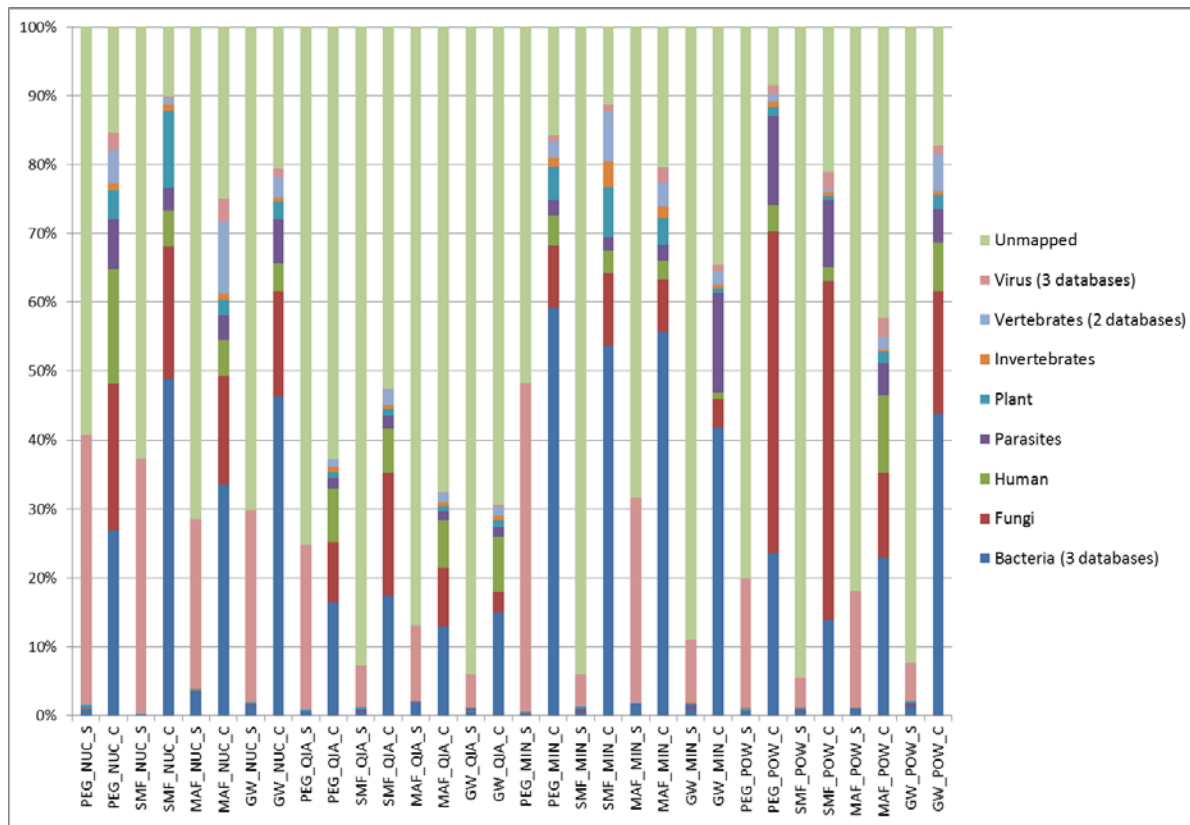

**S1 Fig. Distribution of reads on kingdom level of the 16 method combinations and their associated negative controls.** Samples were processed in triplicate, and the data shown is the average. *\_S* = sample, *\_C* = Negative extraction control. Databases used are listed in S1 Table.
