# Supplementary material for: Evaluation of Methods for the Concentration and Extraction of Viruses from Sewage in the Context of Metagenomic Sequencing
Source: PubMed Central journal article supplement (PMC5242460; doi:10.1371/journal.pone.0170199), 2017-01-18
Supplement: pone.0170199.s003.pdf [file pone.0170199.s003.pdf]

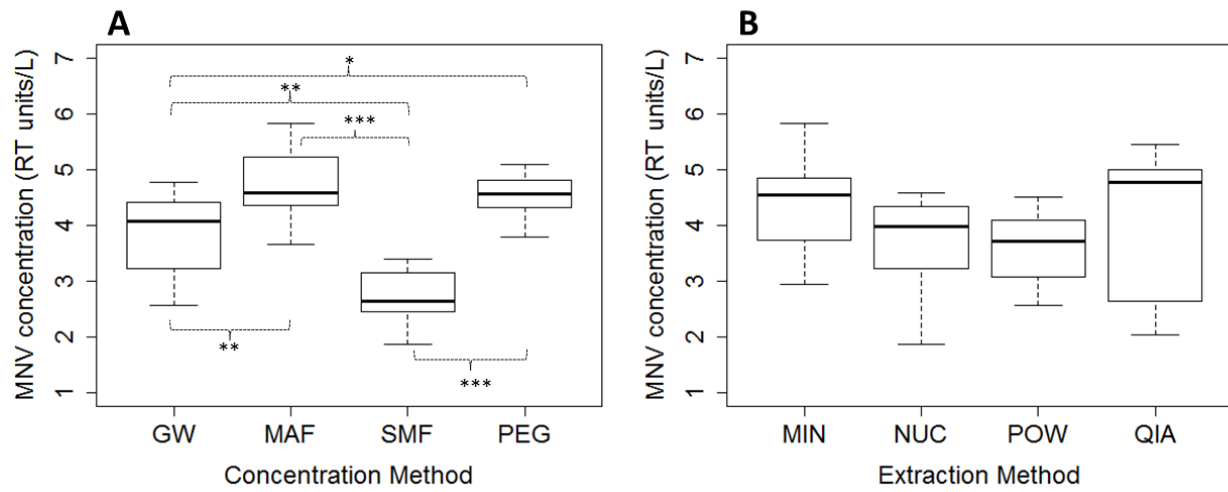

**S3 Fig. MNV concentrations measured by qPCR.** (A) MNV concentration in extracts obtained by using four different concentration methods and (B) extraction methods. The bar, box and whiskers represents the median, the inter-quartile range, and the inter-quartile range times 1.5, respectively. Asterisks represent significance level of a pairwise t-test with “Holm-Bonferroni” adjusted p-values. \* =  $p < 0.05$ , \*\* =  $p < 0.01$ , \*\*\* =  $p < 0.001$ .
