# Supplementary material for: Evaluation of Methods for the Concentration and Extraction of Viruses from Sewage in the Context of Metagenomic Sequencing
Source: PubMed Central journal article supplement (PMC5242460; doi:10.1371/journal.pone.0170199), 2017-01-18
Supplement: pone.0170199.s005.pdf [file pone.0170199.s005.pdf]

**S1 Table. Number of reads.** Number of raw reads, reads after quality assessment, and reads not mapping to PhiX, and thus usable for subsequent analysis. *\_S* = sample, *\_C* = Negative control

| <b>Sample</b>    | <b>Raw Reads</b> | <b>After Quality<br/>Assessment</b> | <b>notPhiX</b> |
|------------------|------------------|-------------------------------------|----------------|
| <b>PEG_NUC_S</b> | 3923962          | 3762219                             | 3705374        |
| <b>PEG_NUC_S</b> | 3754402          | 3578360                             | 3532436        |
| <b>PEG_NUC_S</b> | 4271192          | 4095460                             | 4014236        |
| <b>PEG_NUC_C</b> | 559652           | 456178                              | 443970         |
| <b>SMF_NUC_S</b> | 4508374          | 4332741                             | 4264728        |
| <b>SMF_NUC_S</b> | 4360562          | 4192762                             | 4130628        |
| <b>SMF_NUC_S</b> | 4241578          | 4084436                             | 4026938        |
| <b>SMF_NUC_</b>  | 1101064          | 1003153                             | 988386         |
| <b>MAF_NUC_S</b> | 4259050          | 4084200                             | 4030550        |
| <b>MAF_NUC_S</b> | 3719448          | 3529342                             | 3494230        |
| <b>MAF_NUC_S</b> | 3566548          | 3394287                             | 3360646        |
| <b>MAF_NUC_C</b> | 157096           | 119941                              | 116114         |
| <b>GW_NUC_S</b>  | 3411102          | 3289449                             | 3215330        |
| <b>GW_NUC_S</b>  | 2828116          | 2728447                             | 2658842        |
| <b>GW_NUC_S</b>  | 3295268          | 3141210                             | 3017800        |
| <b>GW_NUC_C</b>  | 17392            | 14362                               | 13636          |
| <b>PEG_QIA_S</b> | 3801098          | 3634483                             | 3495492        |
| <b>PEG_QIA_S</b> | 2305672          | 2185372                             | 2080556        |
| <b>PEG_QIA_S</b> | 4290068          | 4145091                             | 4034670        |
| <b>PEG_QIA_C</b> | 4333452          | 4175469                             | 4073050        |
| <b>SMF_QIA_S</b> | 4563326          | 4418363                             | 4320250        |

---

|                  |         |         |         |
|------------------|---------|---------|---------|
| <b>SMF_QIA_S</b> | 2304182 | 2220290 | 2152844 |
| <b>SMF_QIA_S</b> | 3379888 | 3333397 | 3312860 |
| <b>SMF_QIA_C</b> | 3146584 | 3099536 | 3071026 |
| <b>MAF_QIA_S</b> | 1964426 | 1941789 | 1925920 |
| <b>MAF_QIA_S</b> | 1935286 | 1911652 | 1894644 |
| <b>MAF_QIA_C</b> | 2738054 | 2698372 | 2676234 |
| <b>GW_QIA_S</b>  | 3721384 | 3626310 | 3605338 |
| <b>GW_QIA_S</b>  | 2472348 | 2420355 | 2406568 |
| <b>GW_QIA_C</b>  | 2300600 | 2217212 | 2200980 |
| <b>PEG_MIN_S</b> | 3698374 | 3633079 | 3600800 |
| <b>PEG_MIN_S</b> | 2738196 | 2697360 | 2668238 |
| <b>PEG_MIN_S</b> | 1397598 | 1364119 | 1344608 |
| <b>PEG_MIN_C</b> | 133788  | 123893  | 120862  |
| <b>SMF_MIN_S</b> | 2071278 | 2035964 | 2010478 |
| <b>SMF_MIN_S</b> | 1530636 | 1495490 | 1467210 |
| <b>SMF_MIN_S</b> | 1380108 | 1345321 | 1318090 |
| <b>SMF_MIN_C</b> | 67886   | 61172   | 58602   |
| <b>MAF_MIN_S</b> | 4847266 | 4740720 | 4647822 |
| <b>MAF_MIN_S</b> | 3504602 | 3437665 | 3380912 |
| <b>MAF_MIN_S</b> | 3932158 | 3851802 | 3781236 |
| <b>MAF_MIN_C</b> | 569434  | 545835  | 533460  |
| <b>GW_MIN_S</b>  | 4373040 | 4276262 | 4213678 |
| <b>GW_MIN_S</b>  | 3547238 | 3469203 | 3406014 |
| <b>GW_MIN_S</b>  | 4630548 | 4519100 | 4442998 |
| <b>GW_MIN_C</b>  | 753804  | 717635  | 705386  |

---

---

|                  |         |         |         |
|------------------|---------|---------|---------|
| <b>PEG_POW_S</b> | 5761750 | 5654298 | 5569710 |
| <b>PEG_POW_S</b> | 5576440 | 5478318 | 5414066 |
| <b>PEG_POW_S</b> | 2058156 | 2020902 | 2007878 |
| <b>PEG_POW_C</b> | 248950  | 231433  | 228512  |
| <b>SMF_POW_S</b> | 4255058 | 4185925 | 4148056 |
| <b>SMF_POW_S</b> | 3539780 | 3490092 | 3458870 |
| <b>SMF_POW_S</b> | 3580896 | 3532534 | 3497672 |
| <b>SMF_POW_</b>  | 1449418 | 1404258 | 1393284 |
| <b>MAF_POW_S</b> | 5355902 | 5272249 | 5206222 |
| <b>MAF_POW_S</b> | 3573108 | 3459546 | 3395826 |
| <b>MAF_POW_S</b> | 3922566 | 3795625 | 3722032 |
| <b>MAF_POW_C</b> | 105730  | 85315   | 83474   |
| <b>GW_POW_S</b>  | 3202862 | 3127023 | 3074676 |
| <b>GW_POW_S</b>  | 4823400 | 4769483 | 4732332 |
| <b>GW_POW_S</b>  | 3343808 | 3276568 | 3241548 |
| <b>GW_POW_C</b>  | 111302  | 105263  | 103502  |

---
