# Supplementary material for: Evaluation of Methods for the Concentration and Extraction of Viruses from Sewage in the Context of Metagenomic Sequencing
Source: PubMed Central journal article supplement (PMC5242460; doi:10.1371/journal.pone.0170199), 2017-01-18
Supplement: pone.0170199.s006.pdf [file pone.0170199.s006.pdf]

## S2 Table. Overview of reference sequence databases and associated download information.

Reference sequence information can be obtained from the URL's shown in 'Download information'.

| <b>Database name</b>               | <b>Download information</b>                                                                                                                                                                                                                                                            |
|------------------------------------|----------------------------------------------------------------------------------------------------------------------------------------------------------------------------------------------------------------------------------------------------------------------------------------|
| <b>MetaHitAssembly<sup>2</sup></b> | <a href="http://www.ncbi.nlm.nih.gov/nuccore/?term=PRJEB674">http://www.ncbi.nlm.nih.gov/nuccore/?term=PRJEB674</a> (PRJEB674 - PRJEB1046)                                                                                                                                             |
| <b>Bacteria<sup>2</sup></b>        | <a href="ftp://ftp.ncbi.nih.gov/genomes/genbank/bacteria">ftp://ftp.ncbi.nih.gov/genomes/genbank/bacteria</a>                                                                                                                                                                          |
| <b>Human</b>                       | <a href="http://www.ncbi.nlm.nih.gov/assembly/GCF_000001405.25/#/def_asm_Primary_Assembly">http://www.ncbi.nlm.nih.gov/assembly/GCF_000001405.25/#/def_asm_Primary_Assembly</a><br>Human genome ver. GRCh37.p13                                                                        |
| <b>Invertebrates</b>               | <a href="ftp://ftp.ncbi.nlm.nih.gov/genomes/genbank/invertebrate">ftp://ftp.ncbi.nlm.nih.gov/genomes/genbank/invertebrate</a>                                                                                                                                                          |
| <b>Protozoa</b>                    | <a href="ftp://ftp.ncbi.nlm.nih.gov/genomes/genbank/protozoa">ftp://ftp.ncbi.nlm.nih.gov/genomes/genbank/protozoa</a>                                                                                                                                                                  |
| <b>Virus<sup>1</sup></b>           | <a href="ftp://ftp.ncbi.nih.gov/genomes/virus">ftp://ftp.ncbi.nih.gov/genomes/virus</a>                                                                                                                                                                                                |
| <b>Virus_NCBI<sup>1</sup></b>      | <a href="http://www.ncbi.nlm.nih.gov/genbank/">http://www.ncbi.nlm.nih.gov/genbank/</a>                                                                                                                                                                                                |
| <b>Virus_Vipr<sup>1</sup></b>      | <a href="http://www.ncbi.nlm.nih.gov/pmc/articles/PMC3245011">http://www.ncbi.nlm.nih.gov/pmc/articles/PMC3245011</a>                                                                                                                                                                  |
| <b>Plants</b>                      | <a href="ftp://ftp.ncbi.nlm.nih.gov/genomes/genbank/plant">ftp://ftp.ncbi.nlm.nih.gov/genomes/genbank/plant</a>                                                                                                                                                                        |
| <b>Fungi</b>                       | <a href="ftp://ftp.ncbi.nlm.nih.gov/genomes/genbank/fungi">ftp://ftp.ncbi.nlm.nih.gov/genomes/genbank/fungi</a>                                                                                                                                                                        |
| <b>Parasites</b>                   | <a href="ftp://ftp.ncbi.nlm.nih.gov/genomes/genbank/parasites">ftp://ftp.ncbi.nlm.nih.gov/genomes/genbank/parasites</a>                                                                                                                                                                |
| <b>Vertebrates</b>                 | <a href="ftp://ftp.ncbi.nlm.nih.gov/genomes/genbank/vertebrates_mammals">ftp://ftp.ncbi.nlm.nih.gov/genomes/genbank/vertebrates_mammals</a><br><a href="ftp://ftp.ncbi.nlm.nih.gov/genomes/genbank/vertebrates_other">ftp://ftp.ncbi.nlm.nih.gov/genomes/genbank/vertebrates_other</a> |

<sup>1</sup> All viral databases were combined into one. <sup>2</sup> All bacterial databases were combined into one.
