# Supplementary material for: Evaluation of Methods for the Concentration and Extraction of Viruses from Sewage in the Context of Metagenomic Sequencing
Source: PubMed Central journal article supplement (PMC5242460; doi:10.1371/journal.pone.0170199), 2017-01-18
Supplement: pone.0170199.s007.pdf [file pone.0170199.s007.pdf]

**S3 Table. qPCR inhibition of MNV and HAdV.** Inhibition of the 16 combinations of concentration and extraction methods. Inhibition was measured using qPCR of undiluted (1:1) and tenfold diluted (1:10) DNA/RNA extracts. The values in the tables represents  $\Delta$ ct between the undiluted and 10 fold diluted samples. A  $\Delta$ ct = -3.3 represent a perfect 10 fold dilution. Samples marked in red represents undiluted extracts that could not be quantifiable, these samples are regarded as the most inhibited.

| Method  | MNV   | HAdV  |
|---------|-------|-------|
| PEG_NUC | -1.80 | 1.07  |
| SMF_NUC |       |       |
| MAF_NUC | -2.38 | -3.65 |
| GW_NUC  | -0.58 | -2.08 |
| PEG_QIA | -1.78 | -2.78 |
| SMF_QIA |       |       |
| MAF_QIA | 0.65  |       |
| GW_QIA  | -0.45 |       |
| PEG_MIN | -3.04 | -2.34 |
| SMF_MIN | 0.04  | -3.51 |
| MAF_MIN | -3.14 | -2.17 |
| GW_MIN  | -2.25 | -2.69 |
| PEG_POW | -0.06 | -1.79 |
| SMF_POW |       |       |
| MAF_POW | -0.42 | 3.07  |
| GW_POW  |       | 0.52  |
