# Supplementary material for: Evaluation of Methods for the Concentration and Extraction of Viruses from Sewage in the Context of Metagenomic Sequencing
Source: PubMed Central journal article supplement (PMC5242460; doi:10.1371/journal.pone.0170199), 2017-01-18
Supplement: pone.0170199.s008.pdf [file pone.0170199.s008.pdf]

**S4 Table. Specifications of the four concentration methods applied in this study.**

|                                                   | <b>PEG 8000<br/>Precipitation<br/>(PEG)</b> | <b>Glass Wool<br/>Filtration (GW)</b> | <b>Monolithic<br/>Affinity<br/>Filtration (MAF)</b> | <b>Skimmed Milk<br/>Flocculation<br/>(SMF)</b> |
|---------------------------------------------------|---------------------------------------------|---------------------------------------|-----------------------------------------------------|------------------------------------------------|
| <b>Primary<br/>Concentration<br/>Technology</b>   | Precipitation                               | Filtration                            | Filtration                                          | Precipitation                                  |
| <b>Secondary<br/>Concentration<br/>Technology</b> | none                                        | PEG 8000<br>precipitation             | 100 kDa<br>ultracentrifugation<br>filters           | Ultracentrifugation                            |
| <b>Maximum input<br/>volume (ml<br/>sewage)</b>   | 500                                         | 4000                                  | 1000                                                | 10000                                          |
| <b>Required<br/>machinery</b>                     | Centrifuge                                  | Peristaltic pump                      | Peristaltic pump                                    | Centrifuge<br>Ultracentrifuge                  |
| <b>Price per sample<br/>(Euro)</b>                | ~20                                         | ~7                                    | ~3                                                  | ~10                                            |
| <b>Length of<br/>procedure (per<br/>sample h)</b> | ~24                                         | ~ 24                                  | ~ 1.5                                               | ~24                                            |
| <b>Minimum elution<br/>volume (ml)</b>            | 1                                           | 1                                     | 3                                                   | 2                                              |
| <b>Possibility of<br/>automatization</b>          | no                                          | no                                    | (yes)*                                              | no                                             |

. \*In development
