# Supplementary material for: Evaluation of Methods for the Concentration and Extraction of Viruses from Sewage in the Context of Metagenomic Sequencing
Source: PubMed Central journal article supplement (PMC5242460; doi:10.1371/journal.pone.0170199), 2017-01-18
Supplement: pone.0170199.s009.pdf [file pone.0170199.s009.pdf]

**S5 Table. Properties of the four nucleic acid extraction kits, QIA, NUC, MIN and, POW applied in this study.**

|                                      | <b>QIAamp Viral RNA Mini Kit (QIA)</b> | <b>Nucleospin RNA XS (NUC)</b> | <b>NucliSENS® miniMAG® (MIN)</b> | <b>PowerViral® Environmental RNA/DNA Isolation Kit (POW)</b> |
|--------------------------------------|----------------------------------------|--------------------------------|----------------------------------|--------------------------------------------------------------|
| <b>Technology</b>                    | Spin column                            | Spin column                    | Magnetic silica beads            | Spin column                                                  |
| <b>Maximum input volume (µl)</b>     | 560                                    | NA                             | 1000                             | 200                                                          |
| <b>DNase step included</b>           | No                                     | Yes                            | No                               | No                                                           |
| <b>Price for 50 samples (Euro)</b>   | 231                                    | 317                            | 304                              | 395                                                          |
| <b>Time for 24 samples (h)</b>       | ~ 3 hours                              | ~ 3 hours                      | ~ 3 hours                        | ~ 3 hours                                                    |
| <b>Minimum elution volume (µl)</b>   | 30                                     | 5                              | 25                               | 50                                                           |
| <b>Possibility of automatization</b> | yes                                    | no                             | yes                              | no                                                           |
| <b>Producer</b>                      | Qiagen                                 | Macherey-Nagel                 | BioMérieux                       | MO BIO                                                       |
